# Supplementary material
Source: PubMed Central journal article supplement (PMC2564497)
Supplement: jmg.2005.032193_2.pdf [file jmg.2005.032193_2.pdf]

**Appendix 2.** Composition of the family sample used for linkage analysis of chromosome 17 and association analysis of the RUNX1 and RAPTOR loci.

| Cohort   | # families informative for linkage* |            |               | # families informative for association* |     |      | total # families |
|----------|-------------------------------------|------------|---------------|-----------------------------------------|-----|------|------------------|
|          | old cohort†                         | new cohort | pooled cohort | TDT                                     | PDT | FBAT |                  |
| German   | 42                                  | 41         | 83            | 71                                      | 84  | 86   | 102              |
| American | 73                                  | 118        | 191           | 397                                     | 421 | 431  | 477              |
| Total    | 115                                 | 159        | 274           | 468                                     | 505 | 517  | 579              |

\*All families informative for the TDT are also informative for the PDT, and all families informative for the PDT are also informative for the FBAT. In contrast, 305 families informative for the FBAT are not informative for linkage, and 62 families informative for linkage are not informative for FBAT.

†The old cohort refers to families previously analyzed for linkage<sup>1</sup>

### Reference

1. Nair RP, Henseler T, Jenisch S, *et al.* Evidence for two psoriasis susceptibility loci (HLA and 17q) and two novel candidate regions (16q and 20p) by genome-wide scan. *Hum Mol Genet* 1997;**6**(8):1349-1356.
