# Supplementary material
Source: PubMed Central journal article supplement (PMC2564497)
Supplement: jmg.2005.032193_3.pdf [file jmg.2005.032193_3.pdf]

**Appendix 3.** Genetic and physical distances and PCR amplification primers for markers used in linkage analysis of chromosome 17 and association analysis of the RUNX1 and RAPTOR loci.

| <b>Marker Name</b> | <b>Alias</b> | <b>Genetic distance from p-terminus (Kosambi cM) †</b> | <b>Genetic distance from p-terminal marker (Haldane cM) ‡</b> | <b>Physical distance from p-terminus (bp) §</b> | <b>Amplification primers¶</b>                         |
|--------------------|--------------|--------------------------------------------------------|---------------------------------------------------------------|-------------------------------------------------|-------------------------------------------------------|
| AFM234wg3          | D17S849      | 0.63                                                   | 0.25                                                          | 417,451                                         | CAATTCTGTTCTAAGATTATTTTGG<br>CTCTGGCTGAGGAGGC         |
| GTAT1A05           | D17S1308     | 1.13                                                   | 0.25                                                          | 608,007                                         | TGTGAAACTTTTGTTCATCACTATAACC<br>TTGGTGACAAAGAAAGTCTCC |
| AFM177xh6          | D17S796      | 16.59                                                  | 18.32                                                         | 6,452,214                                       | CAATGGAACCAAATGTGGTC<br>AGTCCGATAATGCCAGGATG          |
| GATA158H04         |              | 16.81                                                  | 18.54                                                         | 6,533,729                                       | ACATACAGCACAGGCCAAAT<br>CCAGTCTTCCGTCCTACTATGC        |
| GATA8C04           | D17S974      | 28.70                                                  | 31.83                                                         | 10,719,385                                      | AGACCCTGTCTCAGATAGATGG<br>TAAAATAGAAAGTGCCCCTCC       |
| ATA78D02N*         |              | 36.83                                                  | 40.61                                                         | 13,317,440                                      | GGCAAGAGTTTTCCCATTTT<br>GGCAAGAGAACTCACGTAA           |
| AFM192yh2          | D17S799      | 37.00                                                  | 40.78                                                         | 13,371,696                                      | ATTGCCAGCCGTCAGTT<br>GACCAGCATATCATTATAGACAAGC        |
| GATA185H04         | D17S2196     | 47.32                                                  | 52.16                                                         | 17,465,099                                      | CCAACATCTAGAATTAATCAGAATC<br>ATATTTCAATATTGTAACCAGTCC |
| AFM026vh7          | D17S783      | 50.91                                                  | 55.88                                                         | 25,457,788                                      | AGGACTCGAAATGCTTTCAT<br>TAACAGAAAACCTTGGAGCCG         |
| GGAA9D03           | D17S1294     | 52.78                                                  | 57.79                                                         | 28,527,909                                      | TGGCATGCAATTGTAGTCTC<br>TTCTTTCCTTACTAAGTTGAGAACG     |
| GATA25A04          | D17S1299     | 69.60                                                  | 77.38                                                         | 39,367,629                                      | TAGCACTTGAGCACACATGG<br>GTGCATTATGGGGACCATTA          |

**Appendix 3.** Continued (page 2 of 5).

| <b>Marker Name</b> | <b>Alias</b> | <b>Genetic distance from p-terminus (Kosambi cM) †</b> | <b>Genetic distance from p-terminal marker (Haldane cM) ‡</b> | <b>Physical distance from p-terminus (bp) §</b> | <b>Amplification primers¶</b>                      |
|--------------------|--------------|--------------------------------------------------------|---------------------------------------------------------------|-------------------------------------------------|----------------------------------------------------|
| AFM200zf4          | D17S800      | 69.67                                                  | 77.45                                                         | 39,429,607                                      | GGTCTCATCCATCAGGTTTT<br>ATAGACTGTGTACTGGGCATTGA    |
| AFM095tc5          | D17S787      | 85.01                                                  | 95.11                                                         | 53,756,701                                      | TGGGCTCAACTATATGAACC<br>TTGATACCTTTTTGAAGGGG       |
| AAT245*            |              | 87.17                                                  | 97.32                                                         | 55,77,4591                                      | GCCAAGGCAGGAGGATTACT<br>CCTTTACCACTTGTGGCACTT      |
| GATA49C09          | D17S1290     | 88.27                                                  | 98.43                                                         | 56,806,181                                      | GCAACAGAGCAAGACTGTC<br>GGAAACAGTTAAATGGCCAA        |
| ATA43A10           | D17S2193     | 99.34                                                  | 110.72                                                        | 67,144,939                                      | AAGCACAGAACTGTTTGGG<br>AAGTAAGGGCCTGAAAAAGAC       |
| AFMa112yb5         | D17S1786     | 101.10                                                 | 112.51                                                        | 68,091,874                                      | GAGACTCTGTATGGCACCC<br>AAACTGGATAACGCCCTG          |
| GATA31B11          | D17S2059     | 102.96                                                 | 114.40                                                        | 69,098,201                                      | TGTAATGCTTGTGCAGATGG<br>TGCAGTGATTTTACATTGC        |
| GATA28D11          | D17S1301     | 113.59                                                 | 126.15                                                        | 73,278,071                                      | AAAGAAGATGAAATTGCCATG<br>TAAAAGAATGAAGGTAAAAATGTG  |
| rs745318           |              | 113.67                                                 | 126.24                                                        | 73,360,921                                      | AACCTTCTTTCACCTCATCTTT<br>CAATGTGGCTTTTAGGTAAG     |
| rs734232           |              | 113.67                                                 | 126.24                                                        | 73,362,854                                      | AGGTAGAAATTGAGAAATGGTAAG<br>GTAAATATCCCCGTTAGACAAG |
| rs895691           |              | 113.68                                                 | 126.24                                                        | 73,363,423                                      | AGACCCAGGTCCCTGATACC<br>CCTCTGACAAGGAGCAGGAG       |

**Appendix 3.** Continued (page 3 of 5).

| <b>Marker Name</b> | <b>Alias</b> | <b>Genetic distance from p-terminus (Kosambi cM) †</b> | <b>Genetic distance from p-terminal marker (Haldane cM) ‡</b> | <b>Physical distance from p-terminus (bp) §</b> | <b>Amplification primers¶</b>                     |
|--------------------|--------------|--------------------------------------------------------|---------------------------------------------------------------|-------------------------------------------------|---------------------------------------------------|
| AFM049xc1          | D17S785      | 115.34                                                 | 127.93                                                        | 75,028,564                                      | ATCCCTGGAGAGTGAAAATG<br>AAGGCCAACCTGAAAATAA       |
| AFM107ye3          | D17S937      | 118.10                                                 | 130.77                                                        | 75,944,548                                      | CATGGAGGGACTTGCG<br>TTCCCAGAACCCGGTTT             |
| AFM267xh1          | D17S939      | 118.45                                                 | 131.12                                                        | 76,059,359                                      | AGCTATAAGTAACCATGTTTNTGG<br>TACAGTGCAAACCTCCTACCG |
| TTCA006M*          |              | 118.89                                                 | 131.56                                                        | 76,200,179                                      | TCCCCACGTAAGCATTCTC<br>AGAGGCGCTTGCTAAACAAAG      |
| AFM210xa5          | D17S802      | 120.83                                                 | 133.54                                                        | 76,831,785                                      | GCCACCTGCCCTCAA<br>CTGCCAGCAGAGGCCA               |
| UT952              | D17S674      | 120.84                                                 | 133.55                                                        | 76,905,489                                      | GTGACTTGGTGCTGCACCCTCC<br>GACACAGGGCGAGGCTCTG     |
| AFMb310yf5         | D17S1847     | 123.75                                                 | 136.54                                                        | 77,621,984                                      | GATCACCAGGAACACCC<br>TCTTCAGAGCTTGCCAG            |
| AFM163yg1          | D17S836      | 125.04                                                 | 137.85                                                        | 77,897,068                                      | GTGCATCTGGCTTCATGTTC<br>AGCTTCCACACACTAGGTGC      |
| AFMa238yb5         | D17S1806     | 126.14                                                 | 138.96                                                        | 78,042,795                                      | GATGTGCTTATTTGAAACCTGC<br>TGTAACGTCCACCAGCAGAG    |
| AFMb019zg5         | D17S1830     | 129.57                                                 | 142.53                                                        | 78,496,285                                      | GGGAGACTCCATCTCAAAA<br>ATTTGCCCATCTGCTTT          |
| AFM044xg3          | D17S784      | 129.62                                                 | 142.53                                                        | 78,502,392                                      | GAGTCTCCTAAATGCTGGGG<br>AGCTCCTGCACAGTTCTTAAATA   |
| AAT09*             |              | 131.61                                                 | 144.67                                                        | 79,300,708                                      | TTGGGATGGTGAAAAGGTTT<br>TGCTCACGGTTGTCTGTAG       |

**Appendix 3.** Continued (page 4 of 5).

| <b>Marker Name</b> | <b>Alias</b> | <b>Genetic distance from p-terminus (Kosambi cM) †</b> | <b>Genetic distance from p-terminal marker (Haldane cM) ‡</b> | <b>Physical distance from p-terminus (bp) §</b> | <b>PCR amplification primers¶</b>                |
|--------------------|--------------|--------------------------------------------------------|---------------------------------------------------------------|-------------------------------------------------|--------------------------------------------------|
| rs1564864          |              | 131.71                                                 | 144.67                                                        | 79,342,164                                      | GGCTAGTAATGAGTAAAATGGATG<br>GGGCCTCCACTAGACAAAGT |
| rs2019154          |              | 131.74                                                 | 144.67                                                        | 79,354,463                                      | GGTTCTGAGTTTTTGTCTGTTTG<br>GGTGCTGTGCCTCTGAAG    |
| rs869190           |              | 131.78                                                 | 144.67                                                        | 79,368,712                                      | GCACTTAAGTAAGGAGGAGTGAT<br>AGTCTCTGGCACACACTAACA |
| AFM217yd10         | D17S928      | 135.67                                                 | 148.80                                                        | 80,931,803                                      | TAAACGGCTACAACACATACA<br>ATTTCCCCTGGCTG          |

\*Marker name comes from human STRP screening set 13 of the Marshfield Center for Medical Genetics (<http://research.marshfieldclinic.org/genetics>).

† Sex-averaged genetic map distances from the p-terminus of chromosome 17 were derived from the deCODE map<sup>1</sup>. Distances for markers not in the deCODE map were interpolated based on the physical locations of the markers in the July 2003 human genome assembly (NCBI Build 34, <http://genome.usc.edu/>).

‡ Genetic map distances from the p-terminal marker of the analysis set used for nonparametric multipoint linkage analysis by Merlin version 0.10.6<sup>2</sup>. They were derived by first converting the deCODE genetic distances from Kosambi cM to Haldane cM and then adjusting distances for four sets of tightly linked markers (D17S849 + D17S1308, rs745318 + rs734232 + rs895691, D17S1830 + D17S784, and AAT095 + rs1564864 + rs2019154 + rs869190) that were clustered and treated as single markers by Merlin to avoid positive bias of the LOD scores<sup>3</sup>.

§ Physical locations of markers are from the July 2003 human genome assembly (NCBI Build 34, <http://genome.usc.edu/>). Locations of the 32 microsatellite markers are denoted by the midpoint of the amplicon; the 6 SNPs are denoted by their actual location.

¶ The sequence of the forward PCR primer for the marker amplicon is listed first, followed by the reverse primer, both in the 5' to 3' direction.

**Appendix 3.** Continued (page 5 of 5).

### **References**

1. Kong A, Gudbjartsson DF, Sainz J, *et al.* A high-resolution recombination map of the human genome. *Nat Genet* 2002;31(3):241-7.
2. Abecasis GR, Cherny SS, Cookson WO, *et al.* Merlin--rapid analysis of dense genetic maps using sparse gene flow trees. *Nat Genet* 2002;30(1):97-101.
3. Abecasis GR, Wigginton JE. Linkage analysis with markers that are in linkage disequilibrium [abstract]. *Am J Hum Genet* 2004.
